# Supplementary material for: Discovery of napabucasin derivatives for the treatment of tuberculosis
Source: Royal Society of Chemistry journal article supplement (doi:10.1039/c9md00295b), 2019-01-01

## Supporting Information

### Discovery of Napabucasin Derivatives for the Treatment of Tuberculosis

Chungen Li<sup>a,1</sup>, Yunxiang Tang<sup>b,c,1</sup>, Zitai Sang<sup>a,1</sup>, Yang Yang<sup>a</sup>, Yamin Gao<sup>b,d</sup>, Tao Yang<sup>a,e</sup>, Cuiting Fang<sup>b,d</sup>, Tianyu Zhang<sup>b,d,\*</sup>, Youfu Luo<sup>a,\*</sup>

<sup>a</sup>Cancer Center, West China Hospital, West China Medical School, Sichuan University, Chengdu, 610041, China

<sup>b</sup>State Key Laboratory of Respiratory Disease, Guangzhou Regenerative Medicine and Health Guangdong Laboratory (GRMH-GDL), Guangzhou Institutes of Biomedicine and Health (GIBH), Chinese Academy of Sciences (CAS) Guangzhou, 510530, China

<sup>c</sup>Institute of Physical Science and Information Technology, Anhui University, Hefei, 230601, China

<sup>d</sup>University of Chinese Academy of Sciences (UCAS), Beijing, 100049, China

<sup>e</sup>Laboratory of Human Diseases and Immunotherapies, West China Hospital, Sichuan University, Chengdu, Sichuan, China.

<sup>1</sup> These authors contributed equally to this work.

\*Corresponding authors.

*E-mail addresses:* zhang\_tianyu@gibh.ac.cn, [luo\\_youfu@scu.edu.cn](mailto:luo_youfu@scu.edu.cn)

## Copies of HRMS and NMR spectra

### <sup>1</sup>H NMR of compound 1a

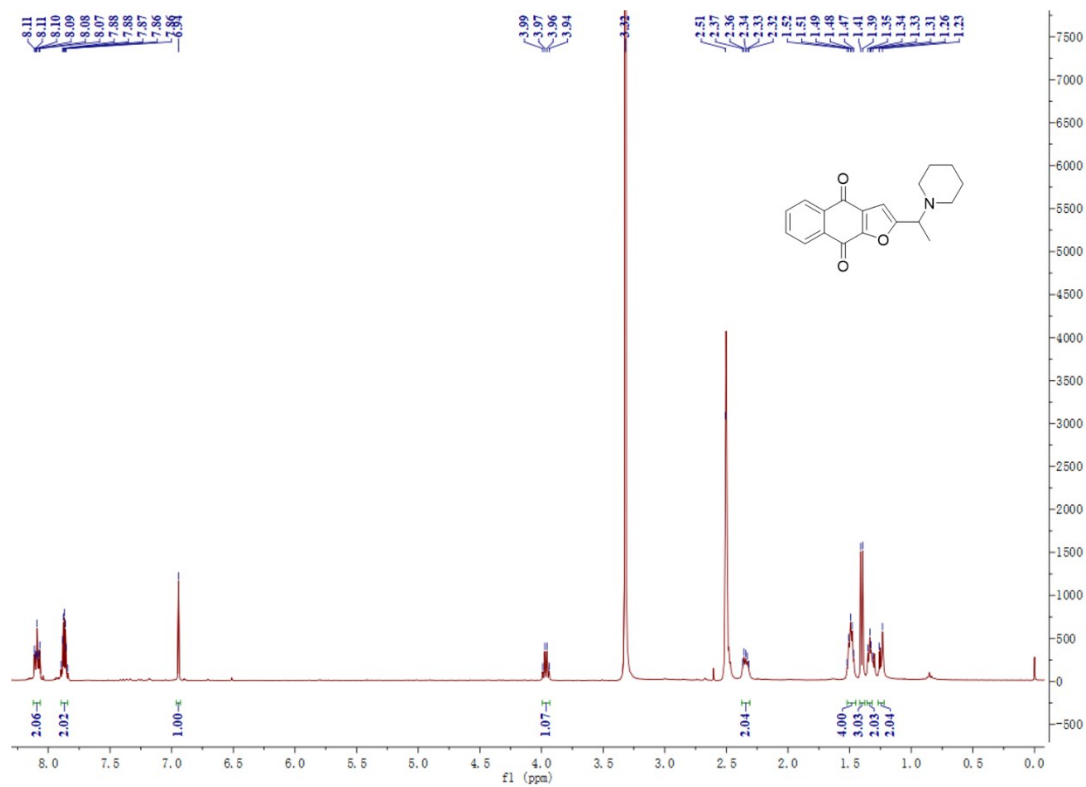

### <sup>13</sup>C NMR of compound 1a

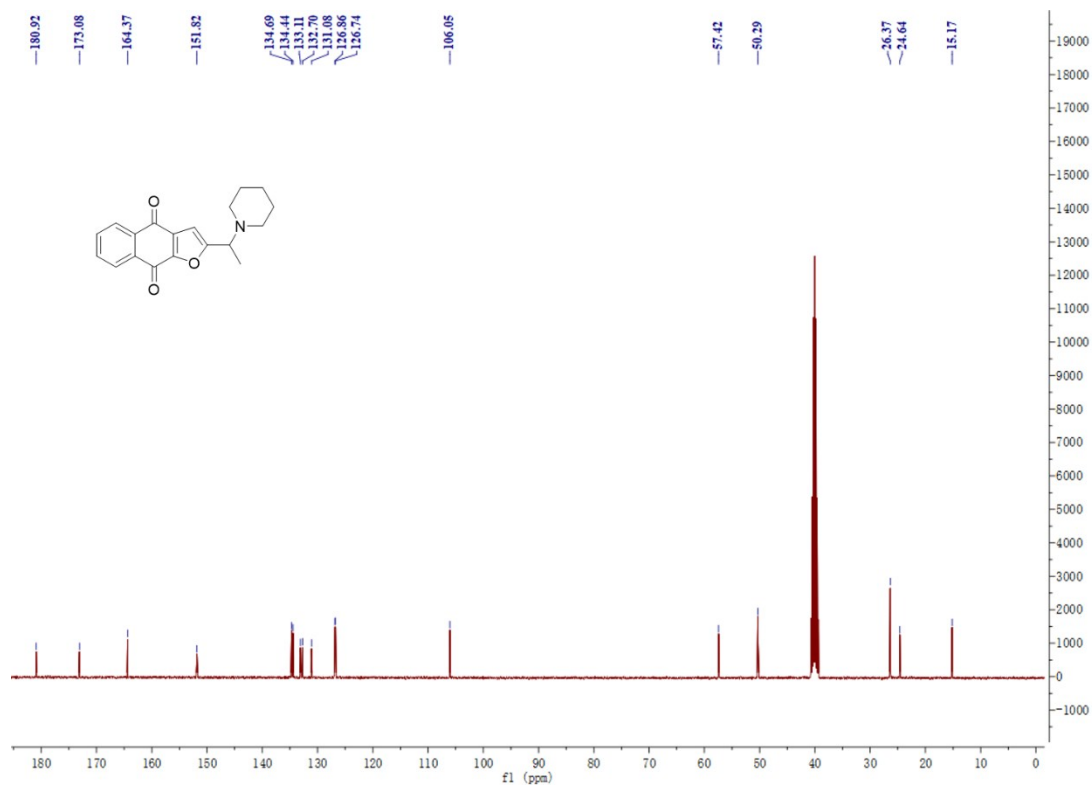

**HRMS of compound 1a**

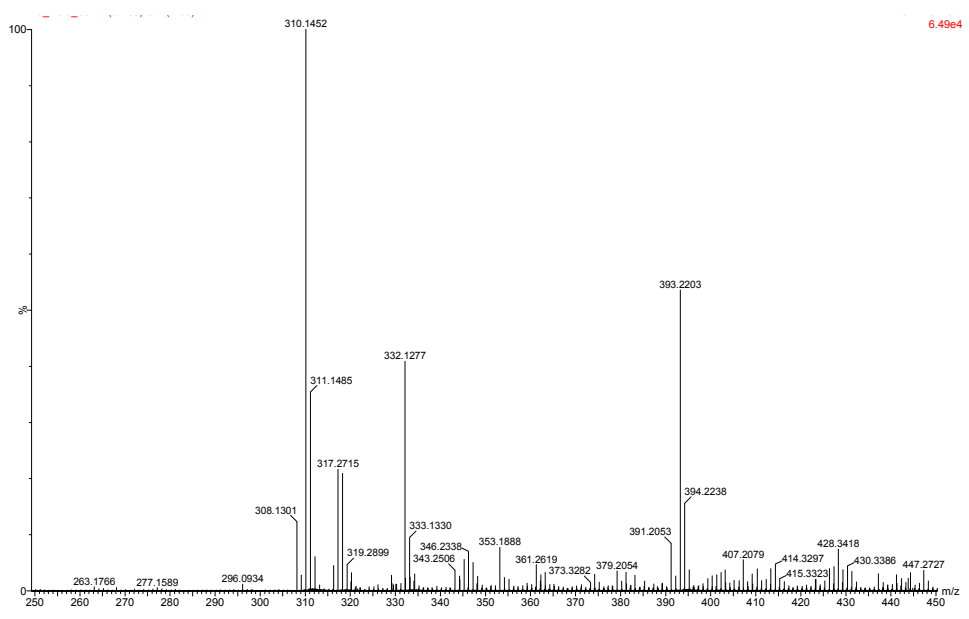

**<sup>1</sup>H NMR of compound 1b**

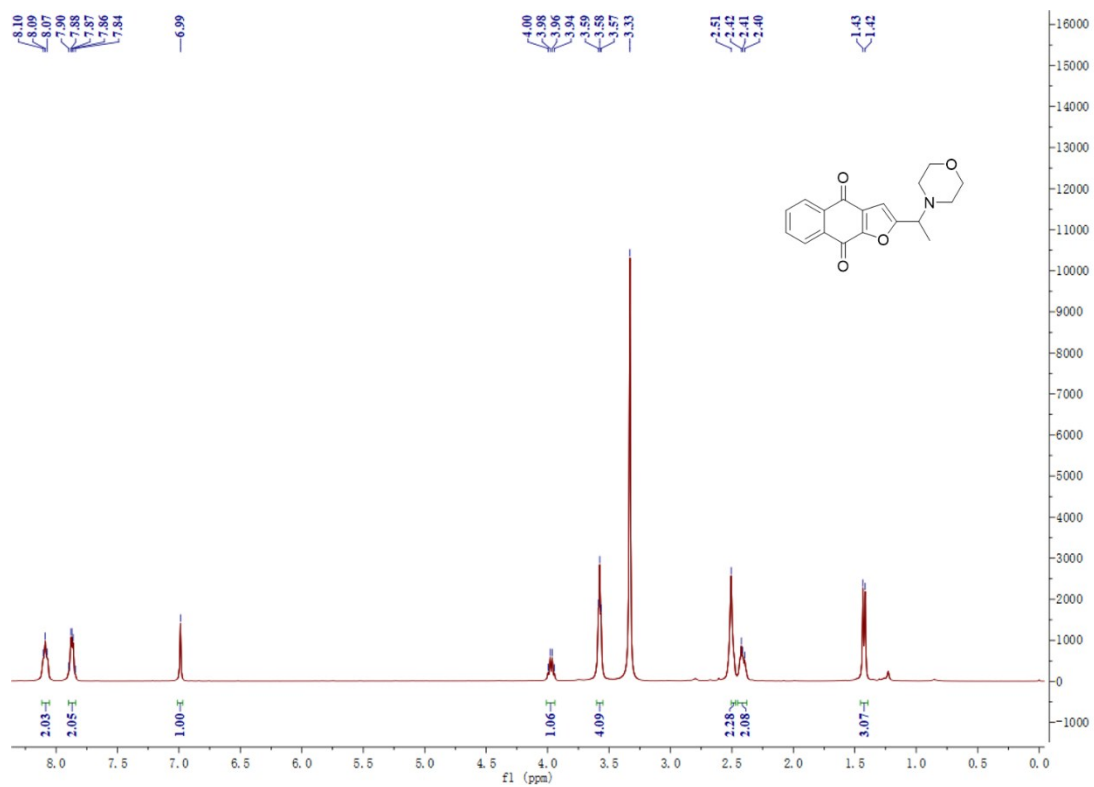

**<sup>13</sup>C NMR of compound 1b**

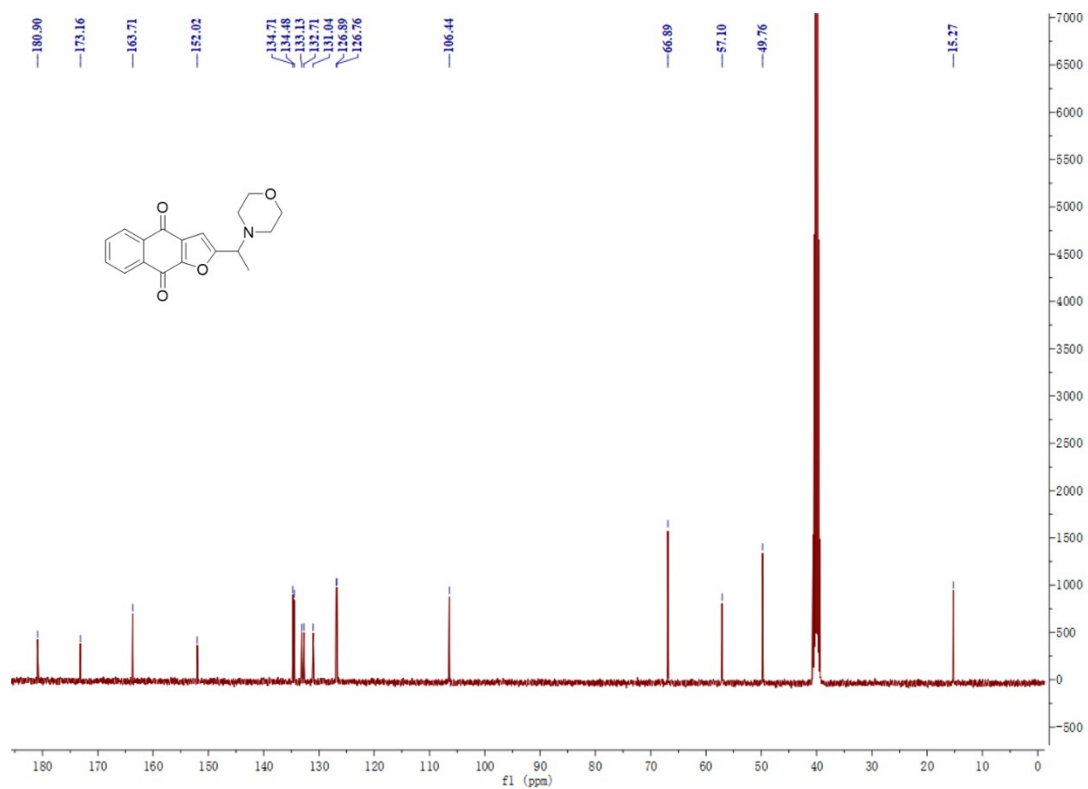

**HRMS of compound 1b**

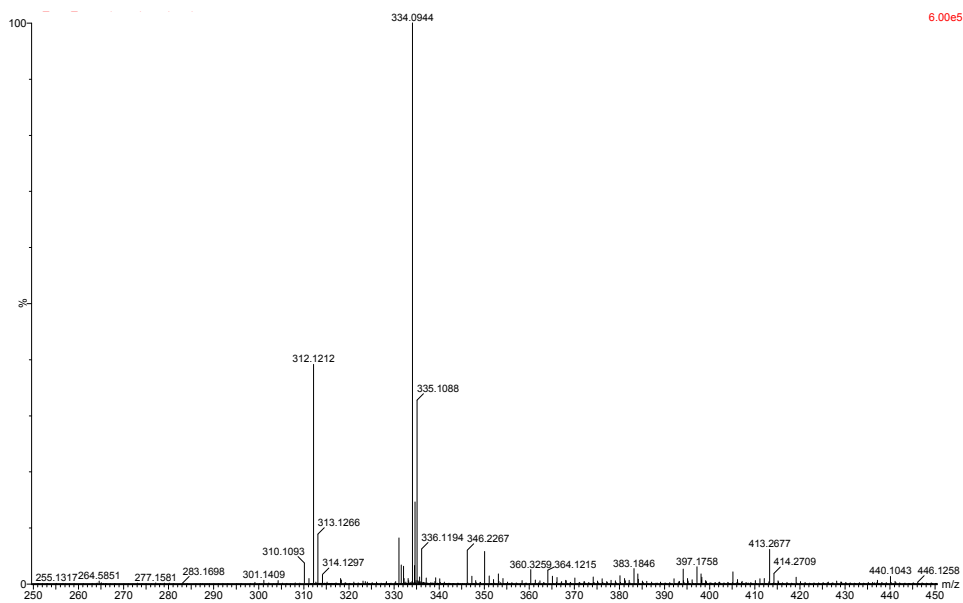

### <sup>1</sup>H NMR of compound 2d

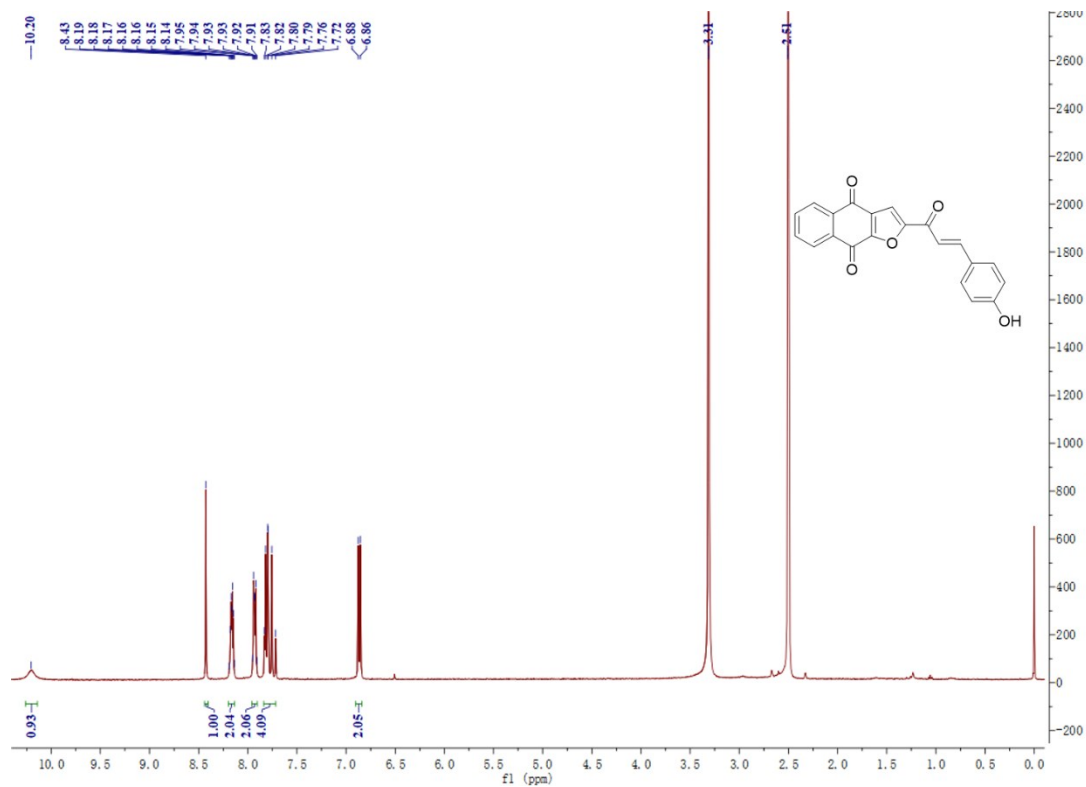

### <sup>13</sup>C NMR of compound 2d

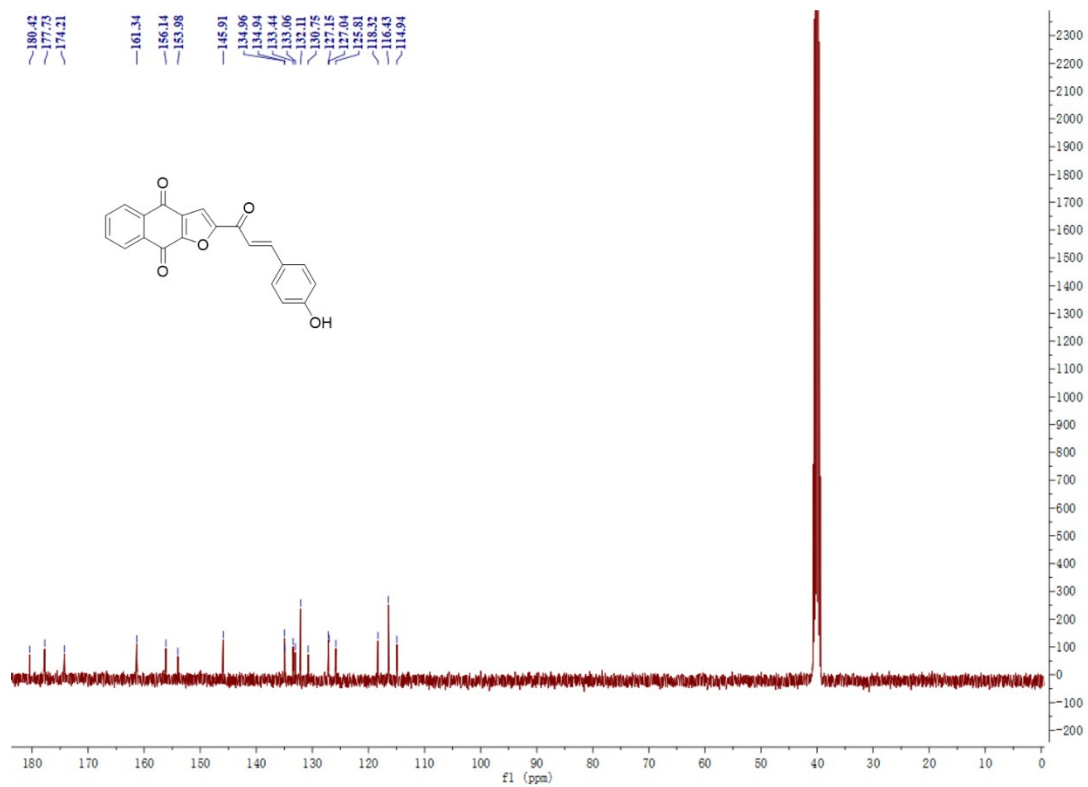

**HRMS of compound 2d**

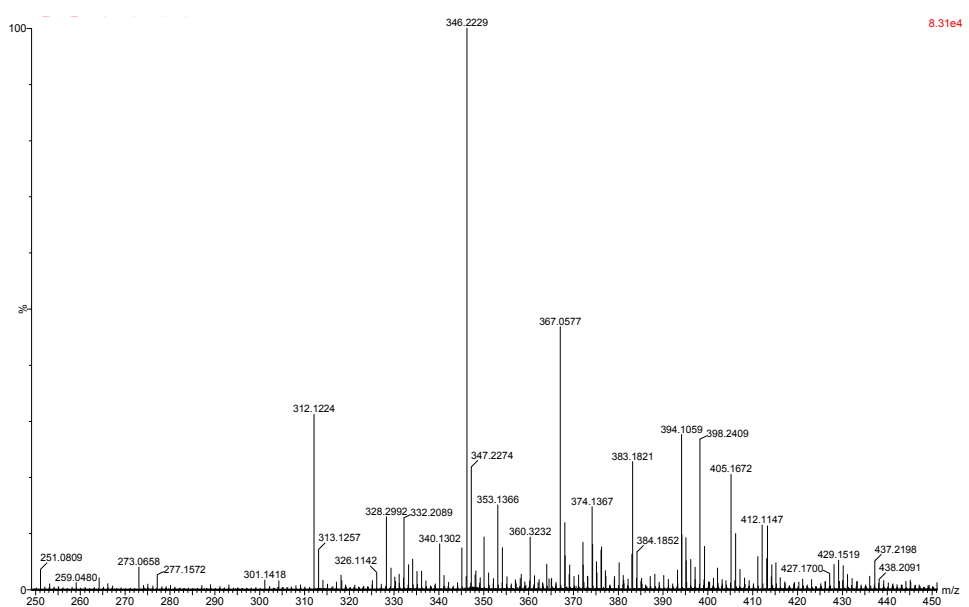

**<sup>1</sup>H NMR of compound 3r**

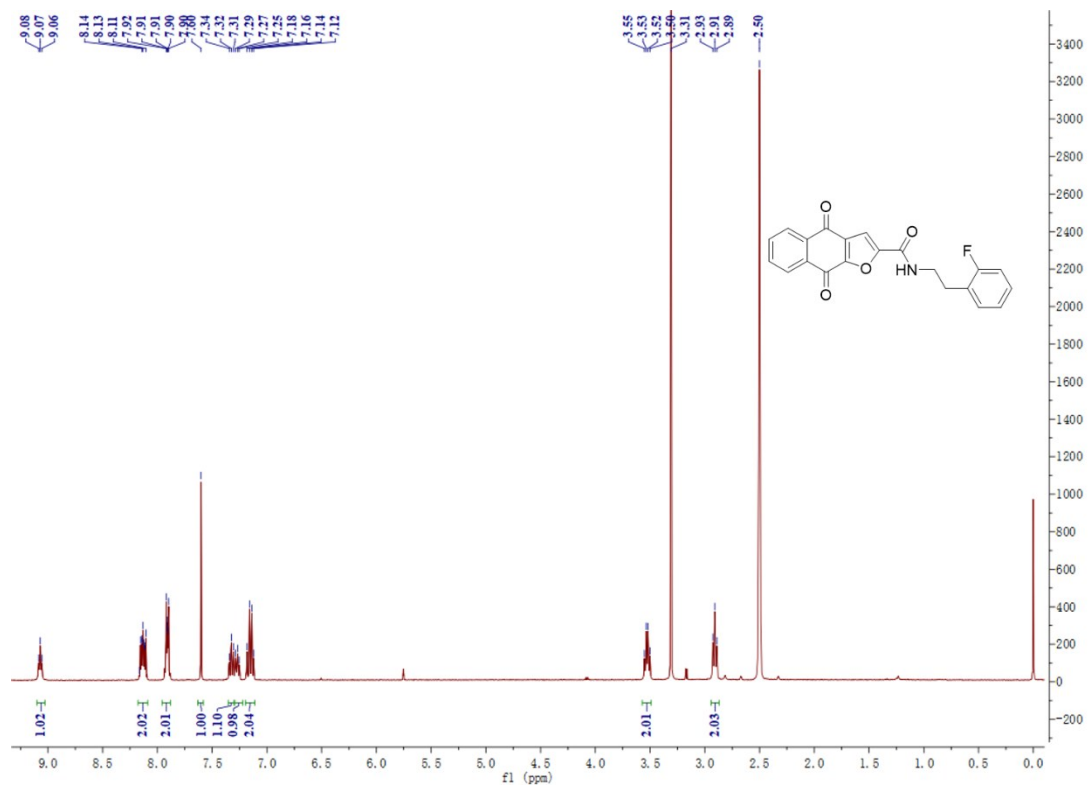

### <sup>13</sup>C NMR of compound 3r

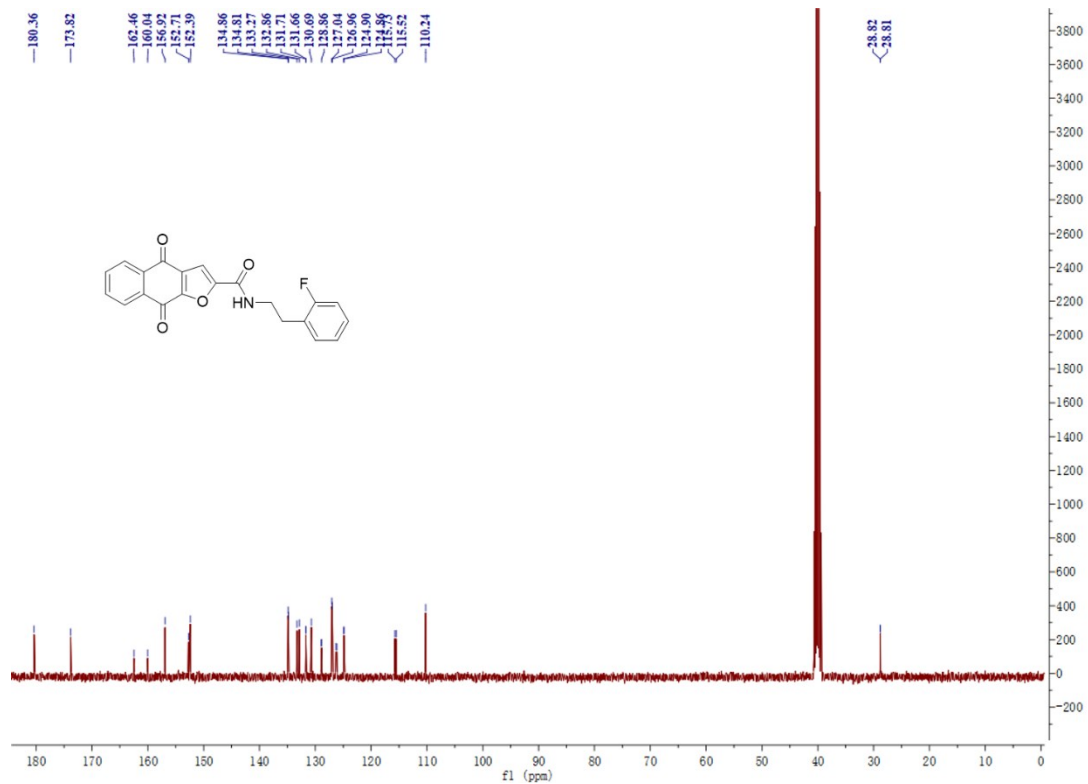

### HRMS of compound 3r

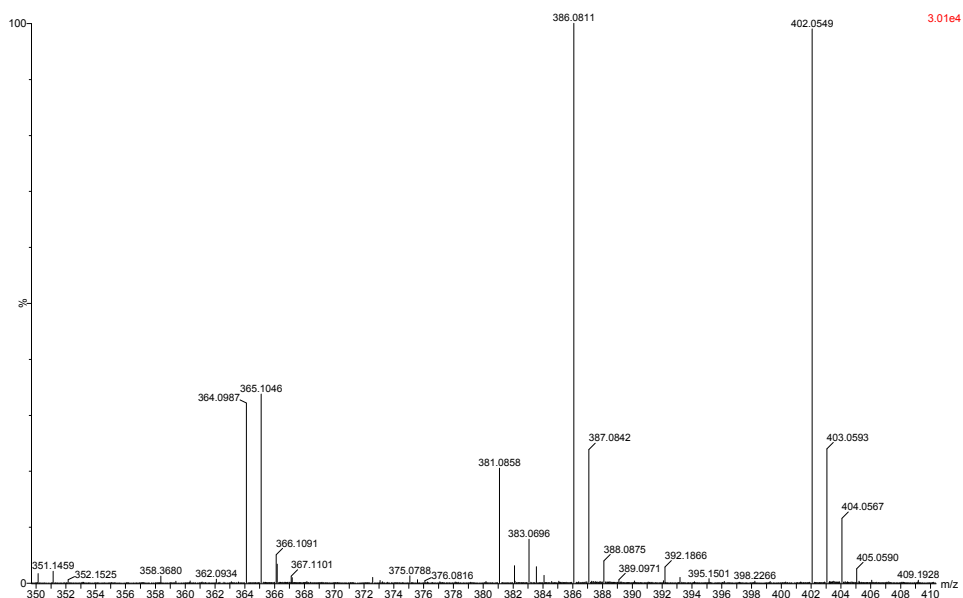

### <sup>1</sup>H NMR of compound 3s

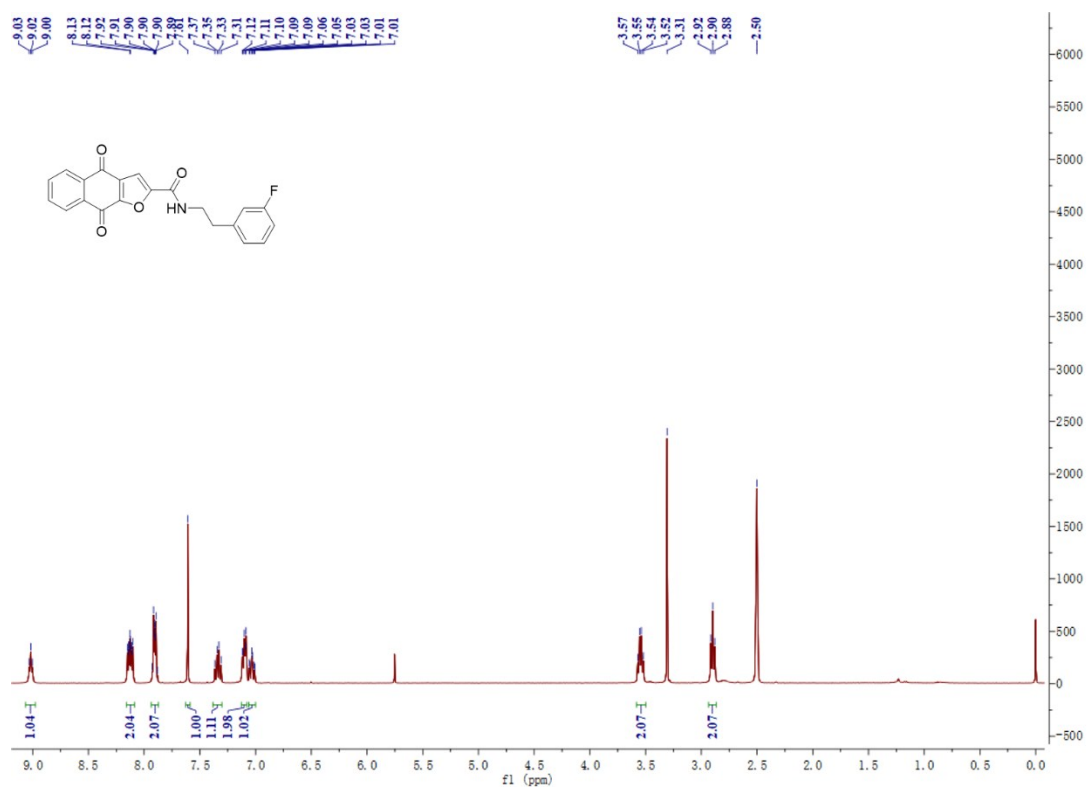

### <sup>13</sup>C NMR of compound 3s



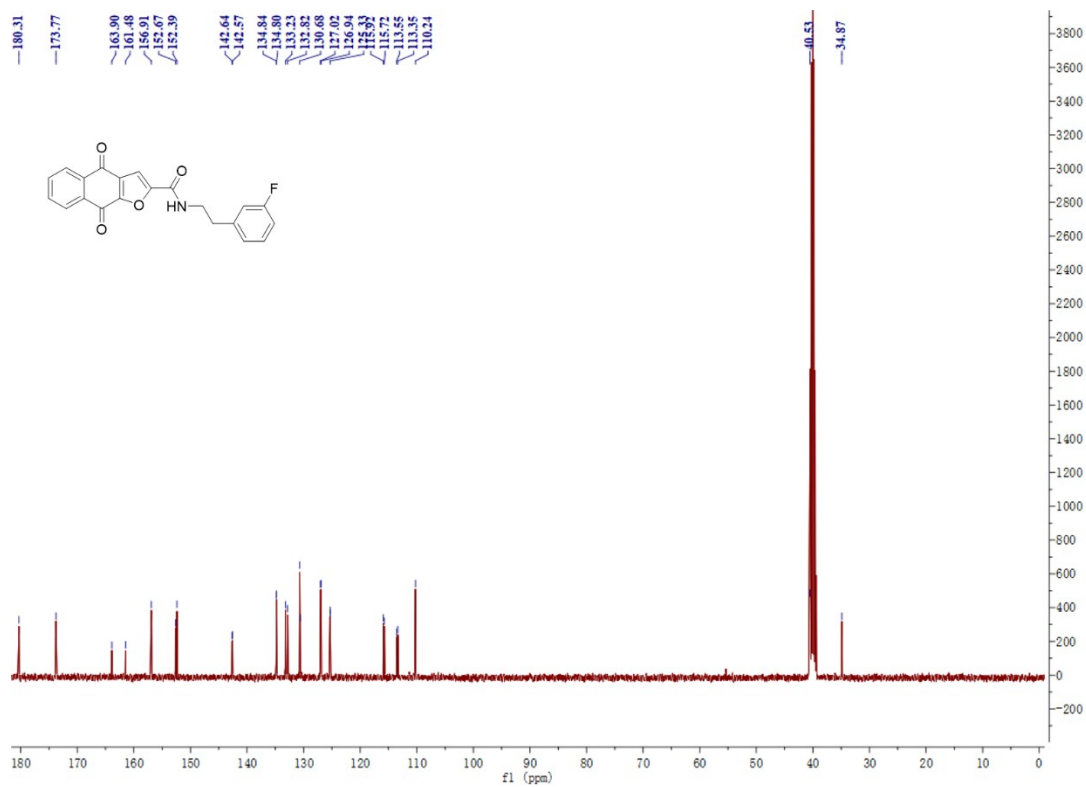

**HRMS of compound 3s**

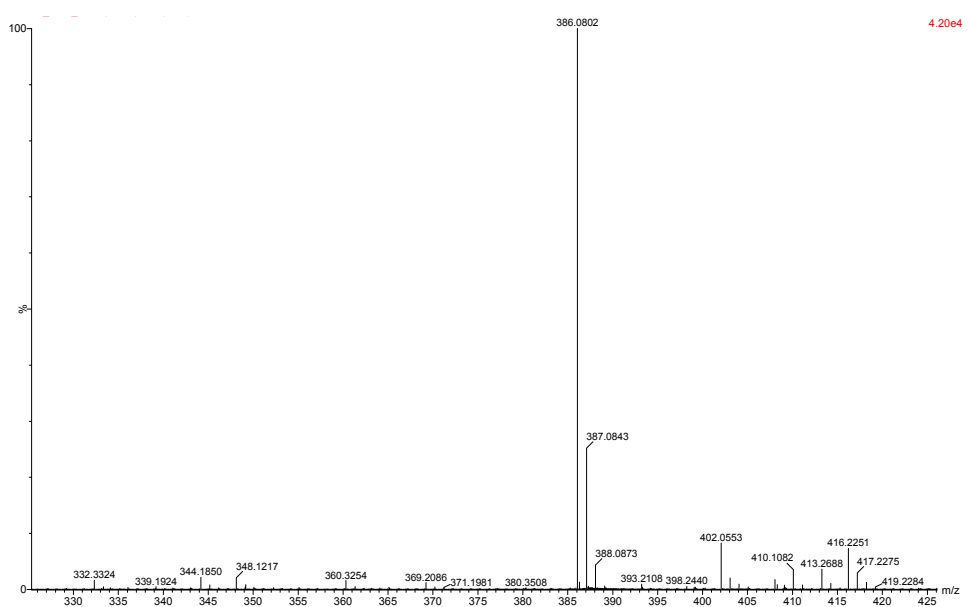

**<sup>1</sup>H NMR of compound 3t**

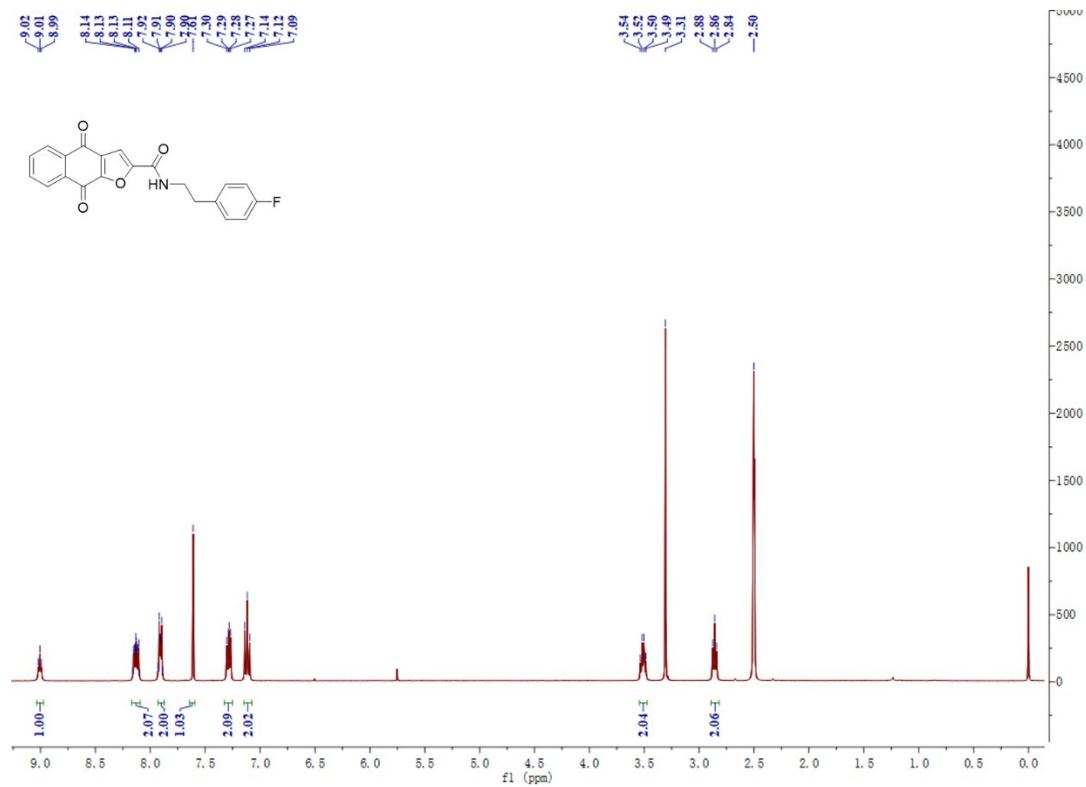

### <sup>13</sup>C NMR of compound 3t

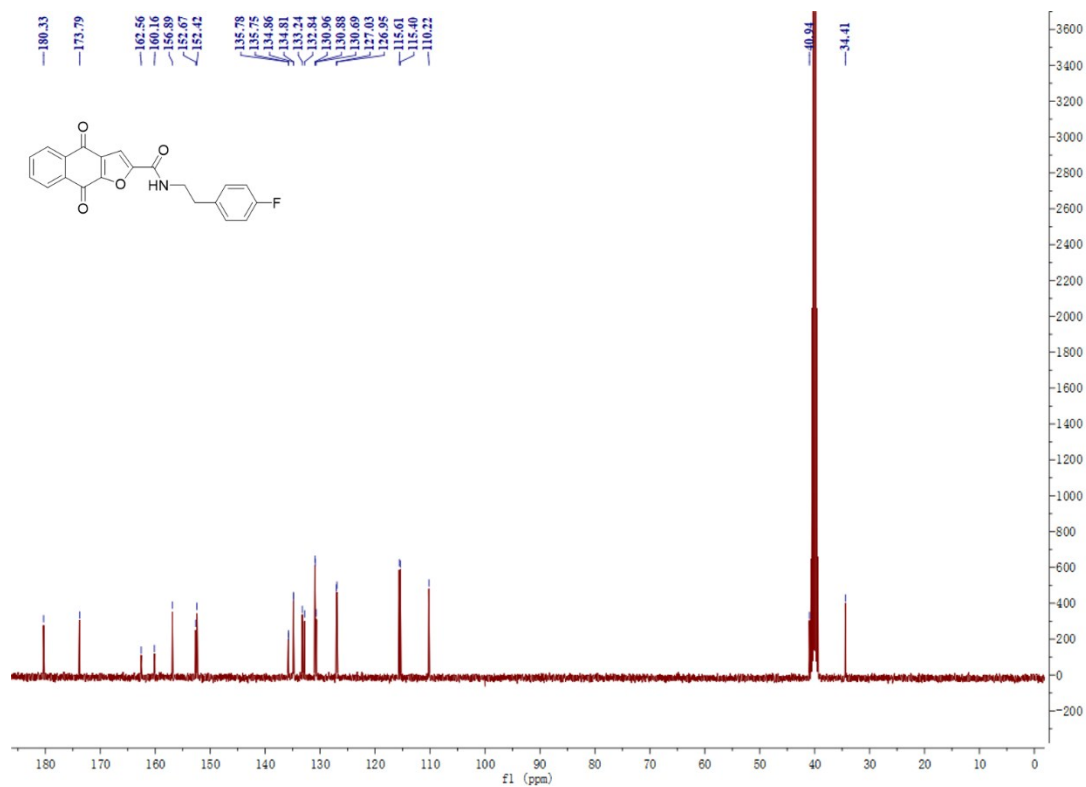

### HRMS of compound 3t

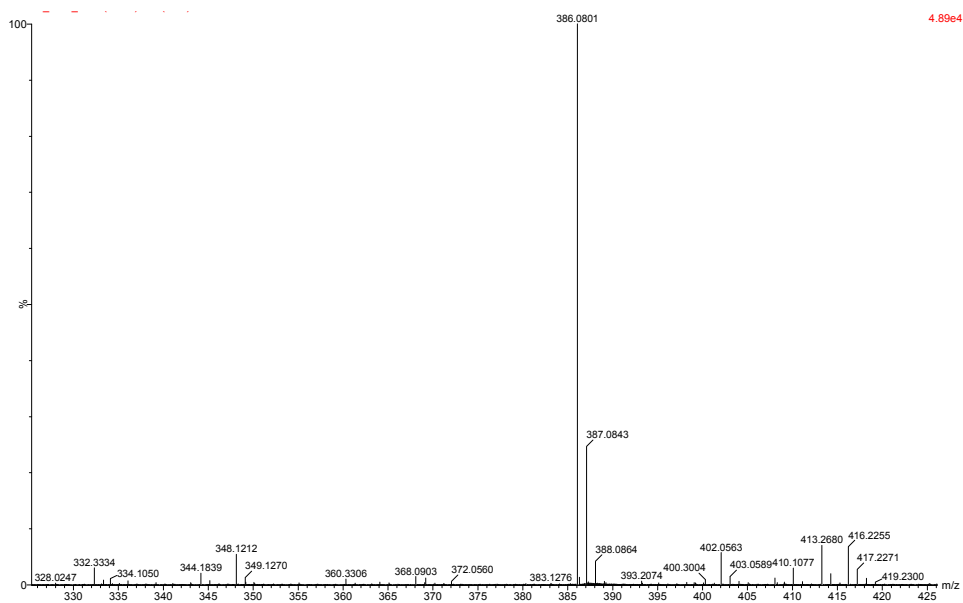

### <sup>1</sup>H NMR of compound 3u

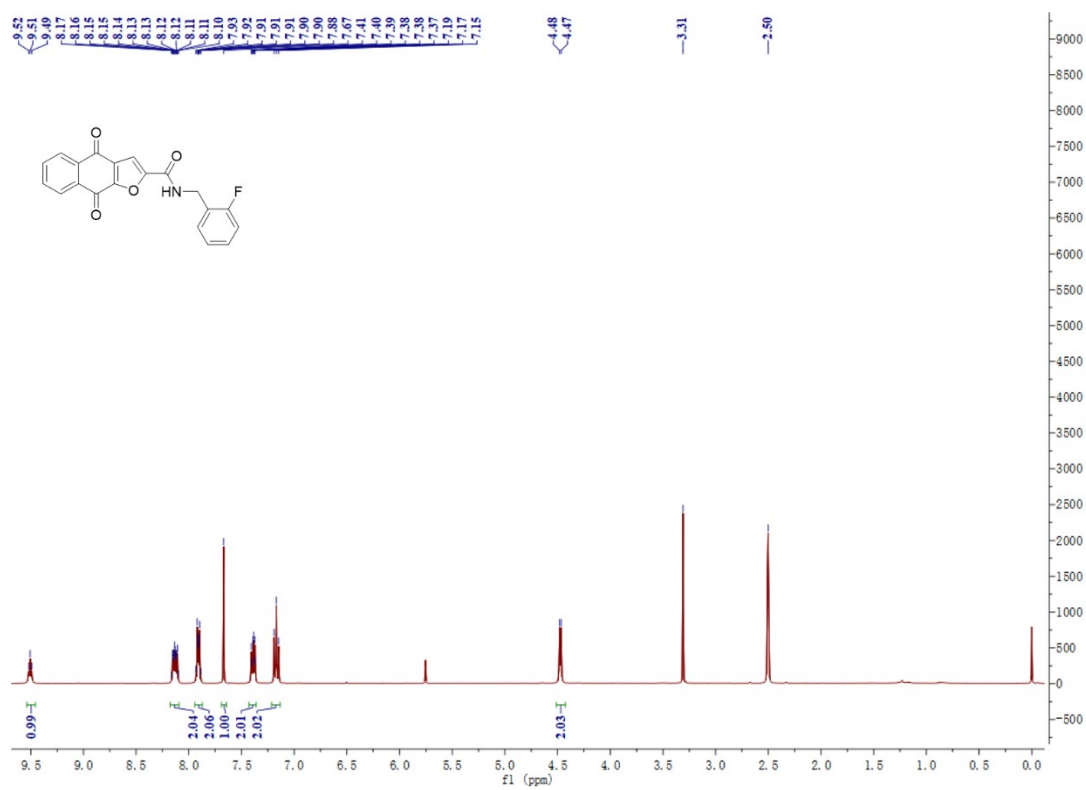

### <sup>13</sup>C NMR of compound 3u

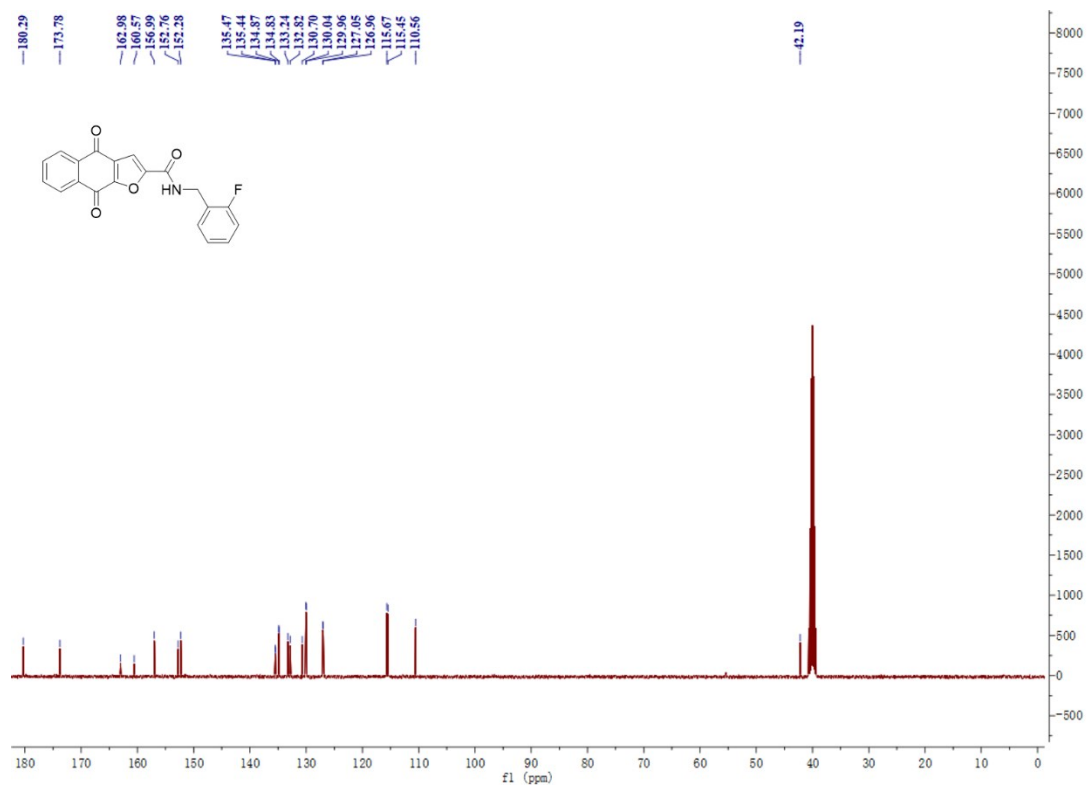

### HRMS of compound 3u

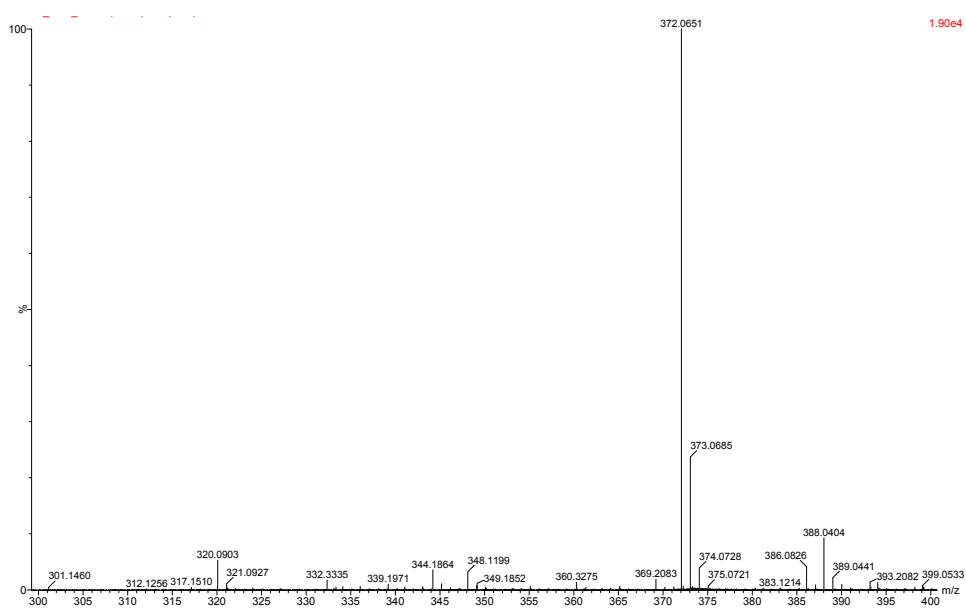

### <sup>1</sup>H NMR of compound 3v

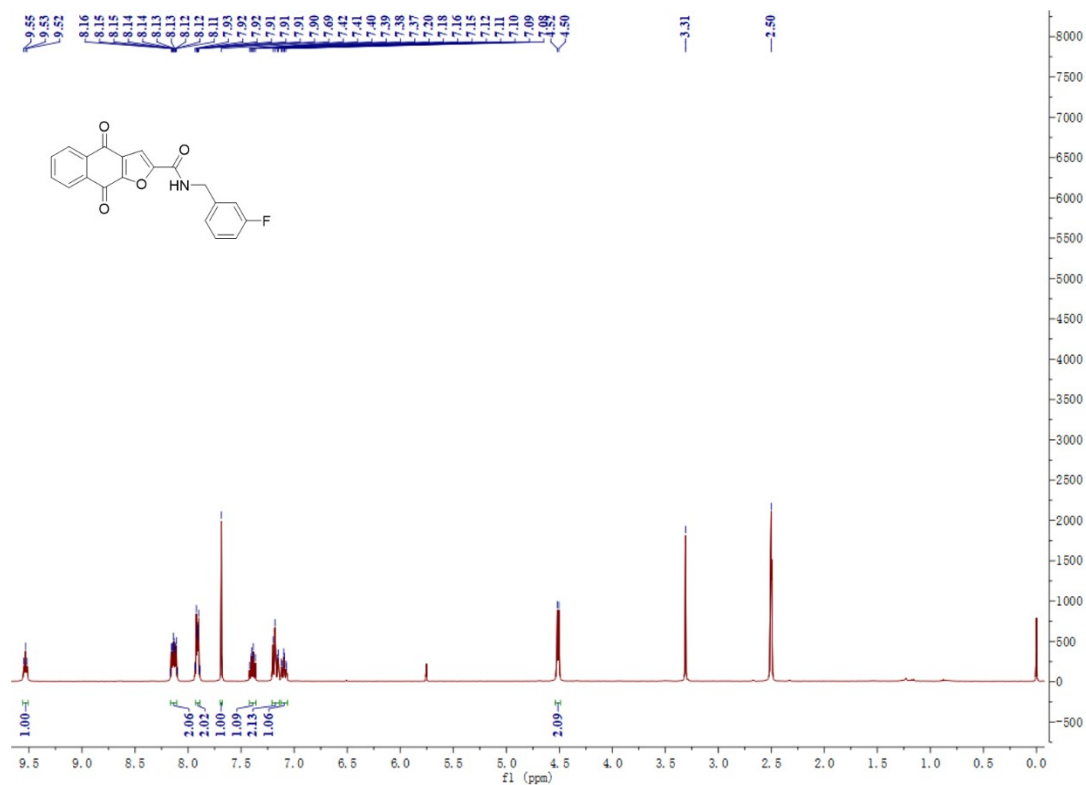

### <sup>13</sup>C NMR of compound 3v

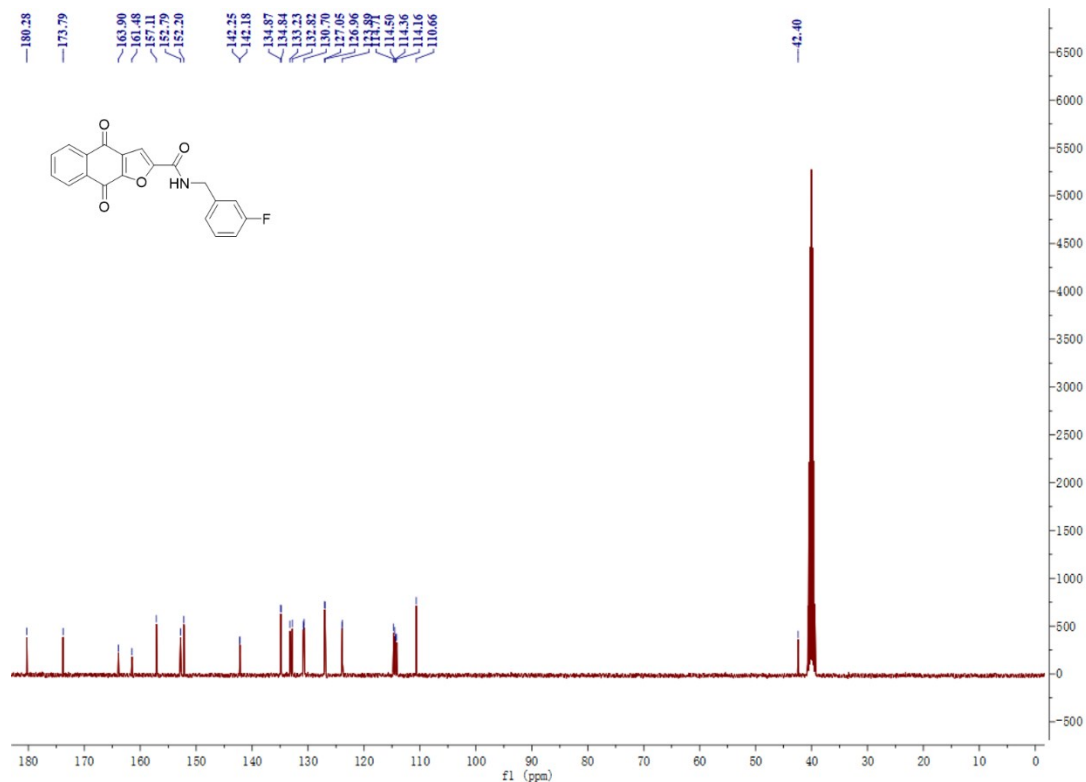

### HRMS of compound 3v

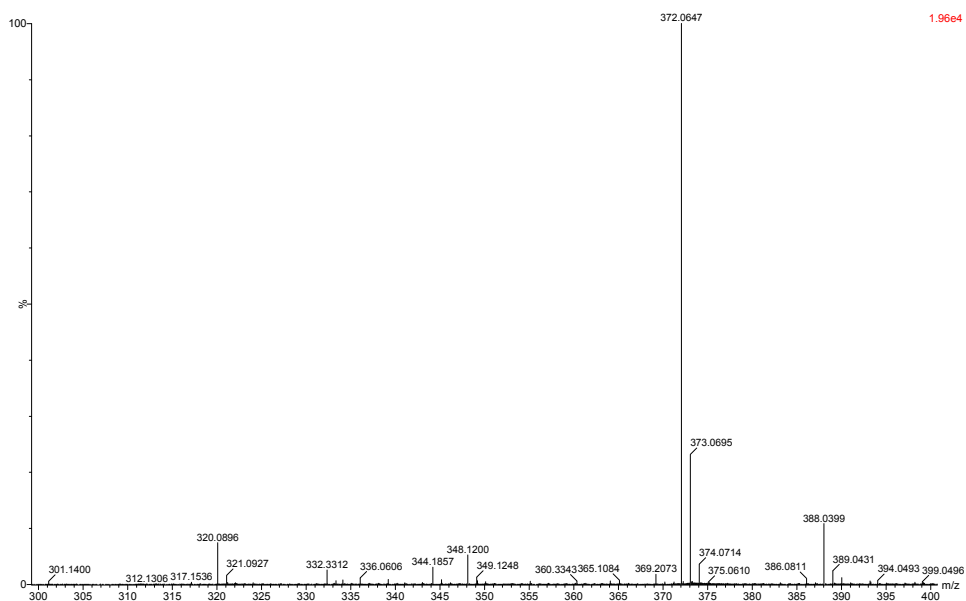

### <sup>1</sup>H NMR of compound 3w

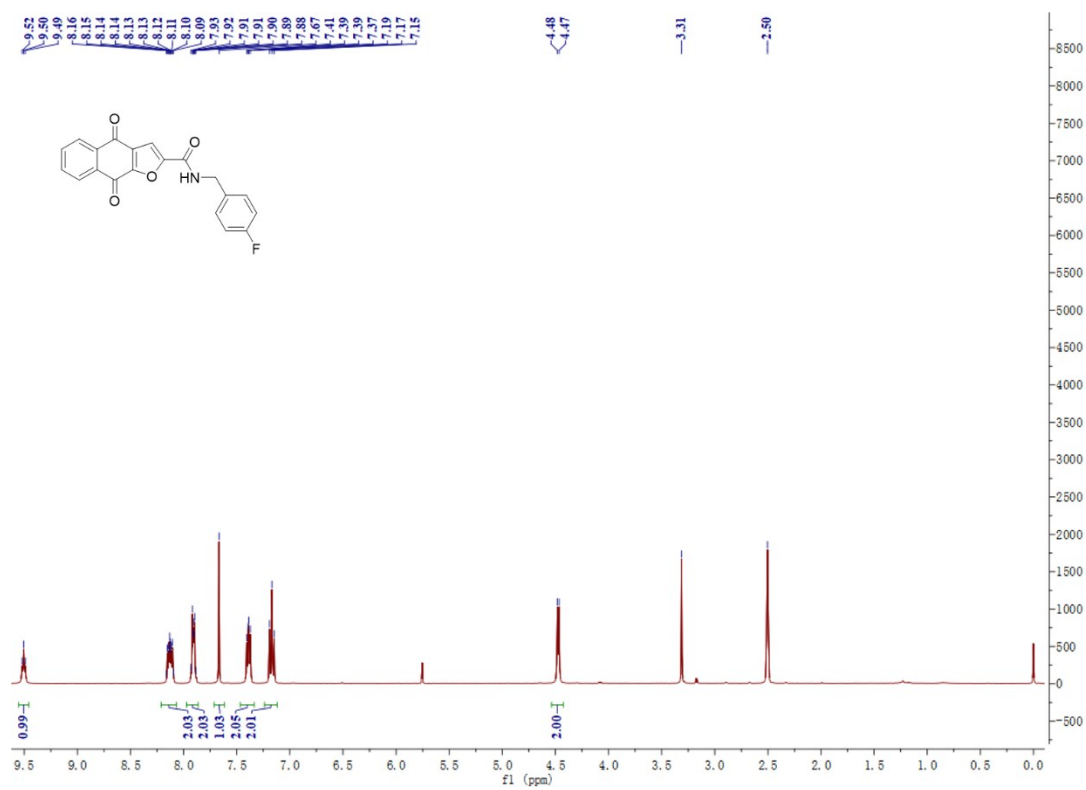

### <sup>13</sup>C NMR of compound 3w

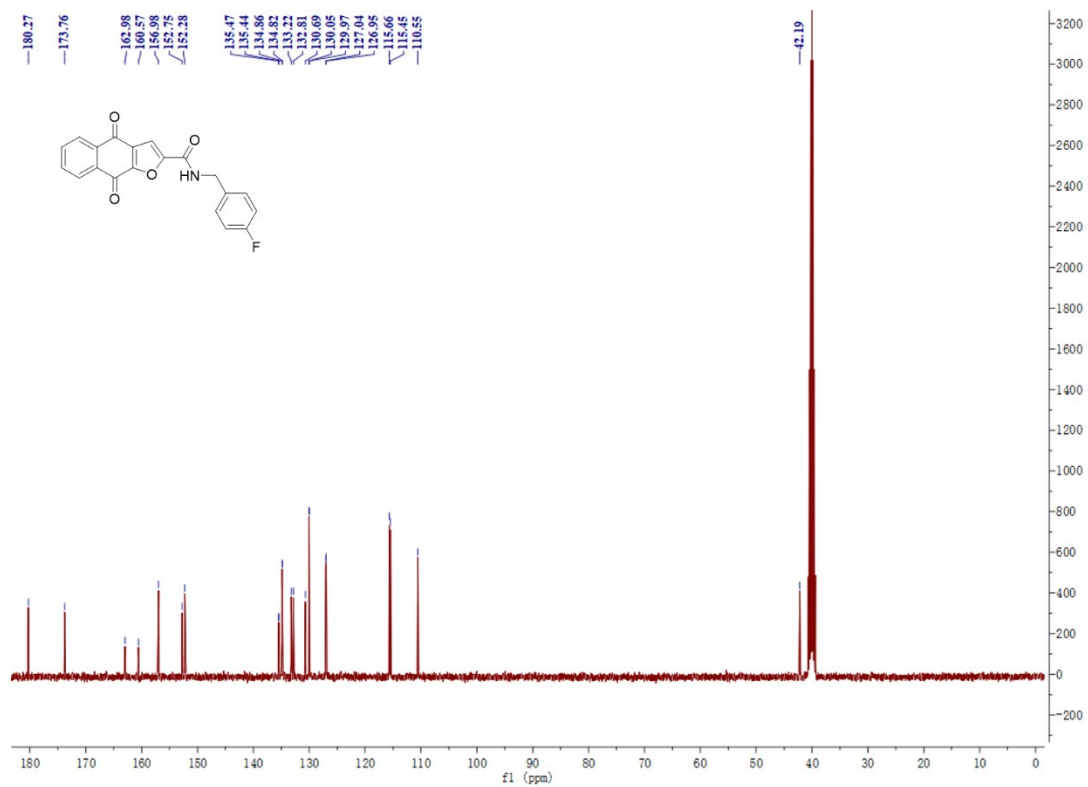

### HRMS of compound 3w

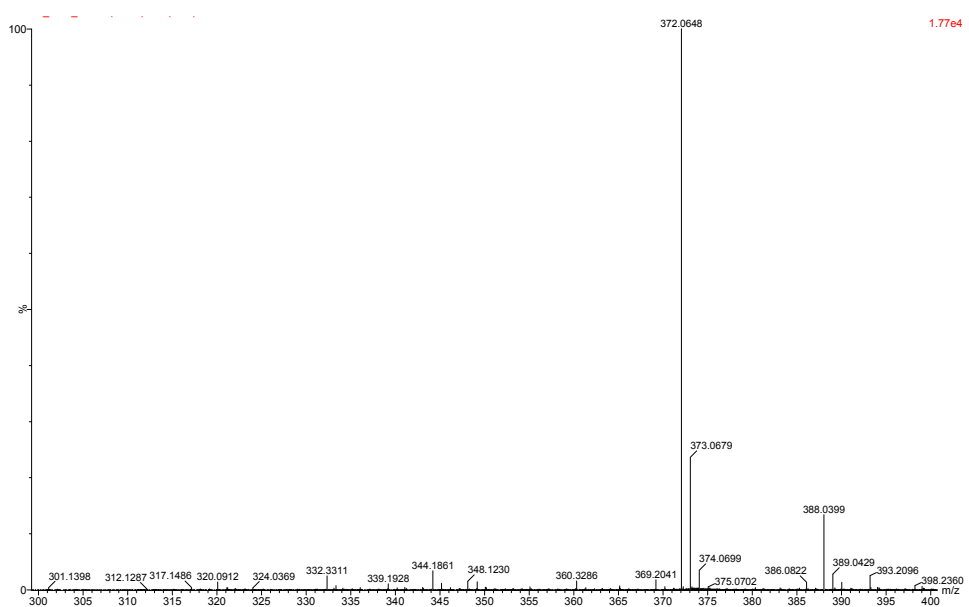

Supplement: c9md00295b2.pdf [file c9md00295b2.pdf]
